# Supplementary material for: Varying the hydrophobic core composition of polymeric nanoparticles affects NLRP3 inflammasome activation
Source: Royal Society of Chemistry journal article supplement (doi:10.1039/d4bm00580e), 2024-01-01
Supplement: d4bm00580e1.pdf [file d4bm00580e1.pdf]

## SUPPORTING INFORMATION

Supplementary Figures and Table

**Figure S1.** Structure and NMR characterization of PEG-CTA

**Figure S2.** MALDI characterization of PEG-CTA

**Figure S3.** NMR characterization of COOH-PEG<sub>5000</sub>-b-BM<sub>y</sub>

**Figure S4.** NMR characterization of COOH-PEG<sub>5000</sub>-b-OM<sub>y</sub>

**Figure S5.** NMR characterization of COOH-PEG<sub>5000</sub>-b-DM<sub>y</sub>

**Figure S6.** GPC characterization of COOH-PEG<sub>5000</sub>-b-HM<sub>x,y</sub>

**Figure S7.** Size distribution analysis of COOH-PEG<sub>5000</sub>-b-HM<sub>x,y</sub> depicted via histograms

**Table ST1.** Size distribution of the SNP series tabulated

**Figure S8.** Determination of IL-1 $\beta$  release by COOH-PEG<sub>5000</sub>-b-HM<sub>x,100</sub> SNPs

**Figure S9.** Cell viability evaluation by MTT assay

**Figure S10.** IL-1 $\beta$  release evaluation by COOH-PEG<sub>5000</sub>-b-HM<sub>x,y</sub> SNPs in NLRP3 and caspase-1 knockout (KO) cells

**Figure S11.** Cellular internalization of SNPs by WT-iBMDMs analyzed by flow cytometry

**Figure S12.** Hemolysis assay of SNPs

**Table ST2.** Histopathological Interpretation of Hematoxylin and eosin-stained tissue samples.
